# Supplementary material for: Switching a molecular shuttle on and off: simple, pH-controlled pseudorotaxanes based on cucurbit[7]uril
Source: Royal Society of Chemistry journal article supplement (doi:10.1039/b601959e), 2006-01-01
Supplement: b601959e.pdf [file b601959e.pdf]

## Electronic Supplementary Information for

Switching a molecular shuttle on and off: Simple, pH-  
controlled pseudorotaxanes based on cucurbit[7]uril

Vladimir Sindelar, Serena Silvi and Angel E. Kaifer\*

*Center for Supramolecular Science and Department of Chemistry,  
University of Miami, Coral Gables, FL 33124-0431, U.S.A.*

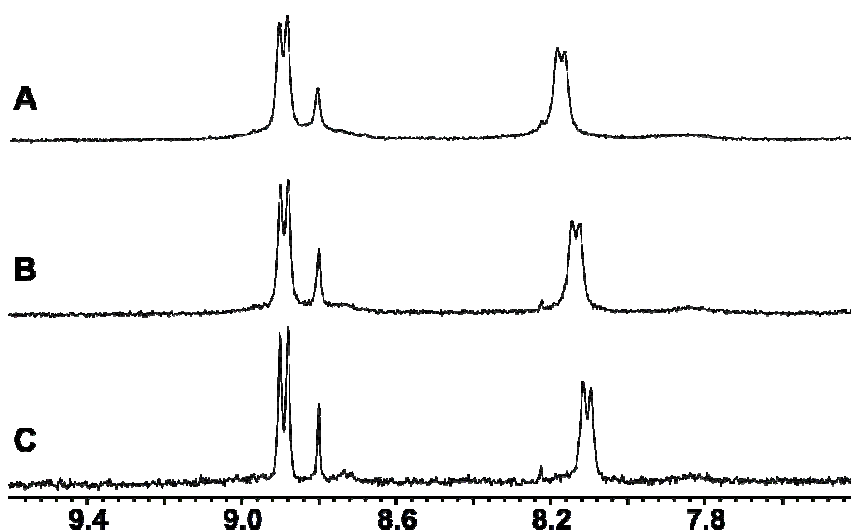

**Figure S1.** <sup>1</sup>H NMR partial spectra (300 MHz, 0.1 M NaCl/D<sub>2</sub>O) of **1**<sup>2+</sup> in the presence of 1.2 equiv CB7 at (A) 5.52 mM, (B) 1.83 mM, and (C) 0.92 mM **1**<sup>2+</sup>.

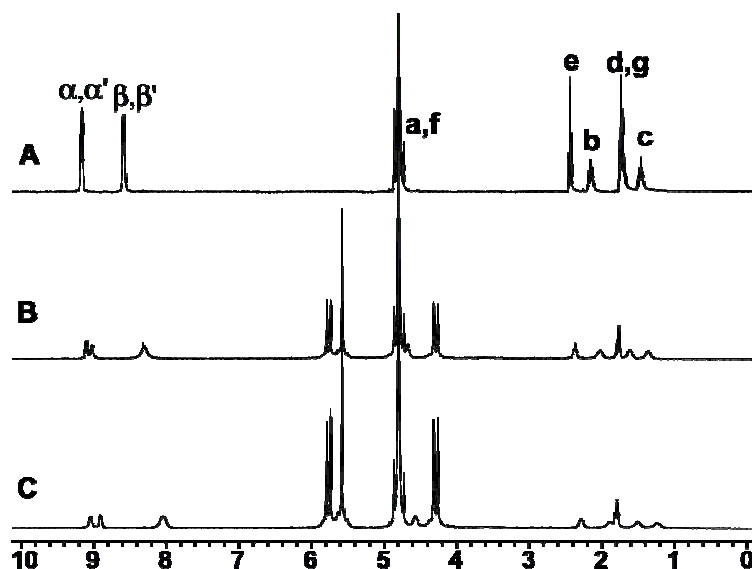

**Figure S2.**  $^1\text{H}$  NMR spectra (300 MHz, 0.1 M NaCl/D $_2\text{O}$ ) of guest  $\mathbf{3}^{2+}$  (A) in the absence and in the presence of (B) 0.5 equiv CB7 at (C) 1.1 equiv CB7.

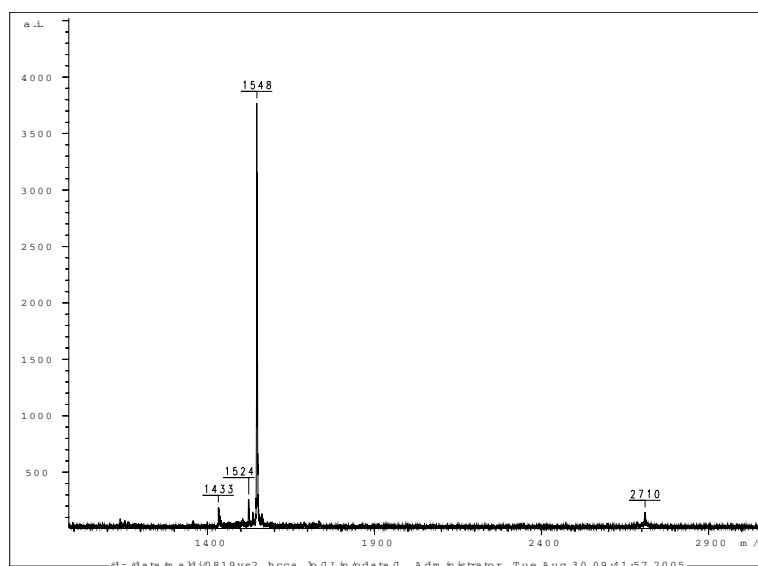

**Figure S3.** MALDI-TOF MS spectra of a solution containing  $\mathbf{1}^{2+}$  (1 equiv) and CB7 (2.5 equiv) in water recorded from an  $\alpha$ -cyano-4-hydroxy-cinnamic acid solid matrix. The peaks at 1,548 and 2,710 were assigned to  $[\text{CB7}\cdot\mathbf{1}]^+$  and  $[(\text{CB7})_2\cdot\mathbf{1}]^+$ , respectively.

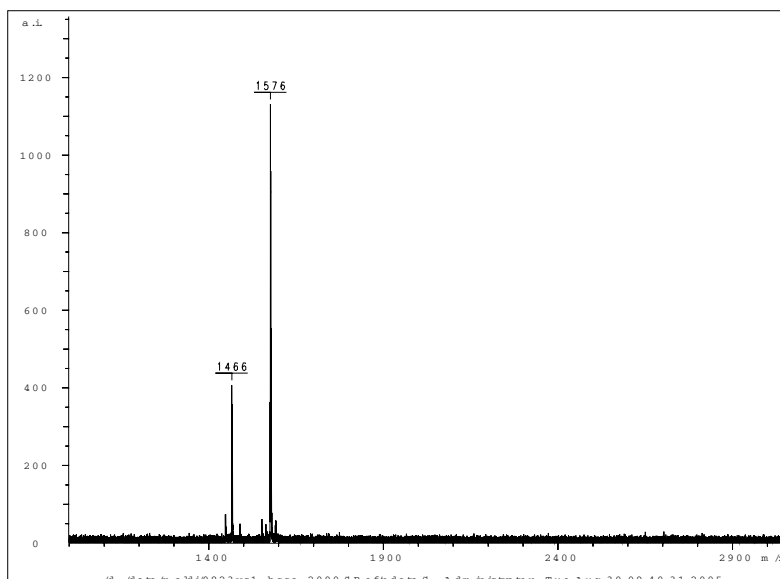

**Figure S4.** MALDI-TOF MS spectra of a solution containing  $2^{2+}$  (1 equiv) and CB7 (1 equiv) in water recorded from an  $\alpha$ -cyano-4-hydroxy-cinnamic acid solid matrix. The peak at 1,576 was assigned to  $[\text{CB7}\cdot\mathbf{2}]^+$ .

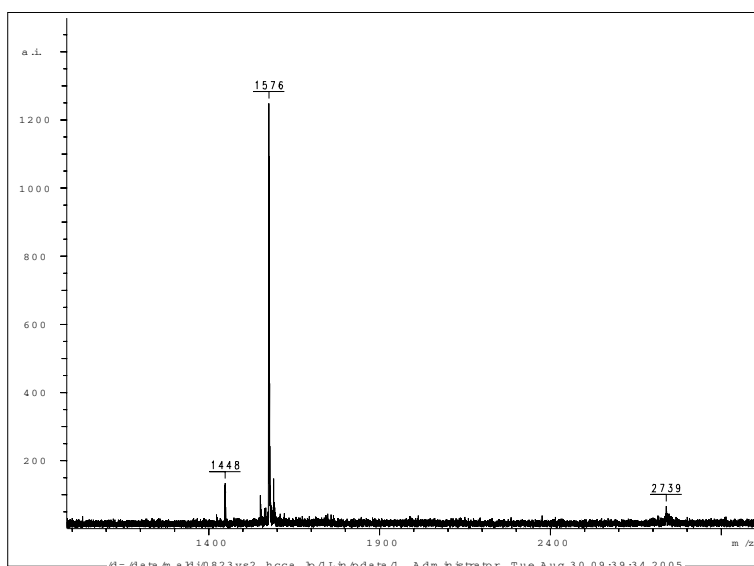

**Figure S5.** MALDI-TOF MS spectra of solution containing  $2^{2+}$  (1 equiv) and CB7 (2.5 equiv) in water recorded from an  $\alpha$ -cyano-4-hydroxy-cinnamic acid matrix. The peaks at 1,576 and 2,739 were assigned to  $[\text{CB7}\cdot\mathbf{2}]^+$  and  $[(\text{CB7})_2\cdot\mathbf{2}]^+$ , respectively.

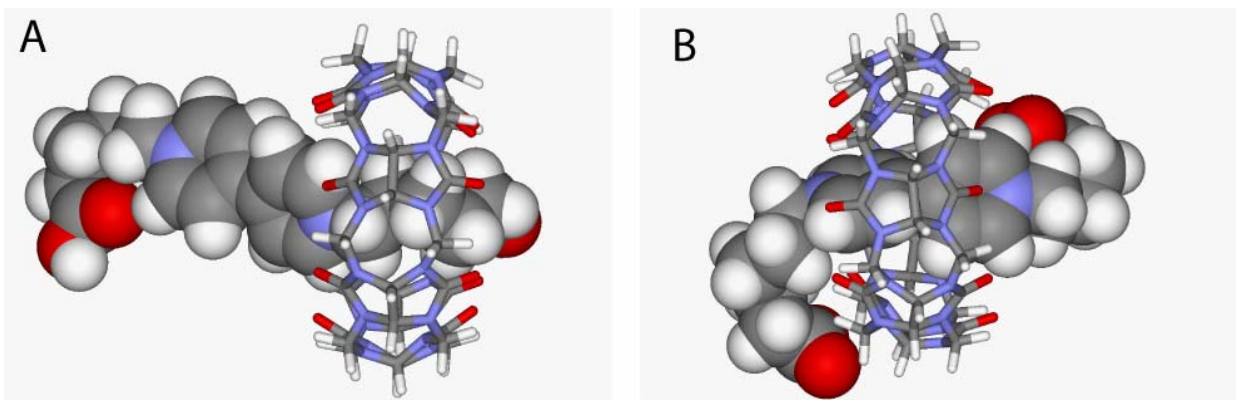

**Figure S6.** Energy minimized structures as calculated with the semi-empirical AM1 method for the (A) protonated (CB7•1<sup>2+</sup>) and (B) deprotonated (CB7•1) forms of the complex.
